# Supplementary material for: Identification of two novel Rhizoctonia solani-inducible cis-acting elements in the promoter of the maize gene, GRMZM2G315431
Source: PubMed Central journal article supplement (PMC5292686; doi:10.1038/srep42059), 2017-02-06
Supplement: srep42059-s1.pdf [file srep42059-s1.pdf]

**Identification of two novel *Rhizoctonia solani*-inducible *cis*-acting elements in the promoter of the maize gene, *GRMZM2G315431***

Ning Li<sup>1,3</sup>, Jing Chen<sup>2,3</sup>, Fangfang Yang<sup>1</sup>, Shutong Wei<sup>2</sup>, Lingguang Kong<sup>2</sup>, Xinhua Ding<sup>2\*</sup>, Zhaohui Chu<sup>1\*</sup>

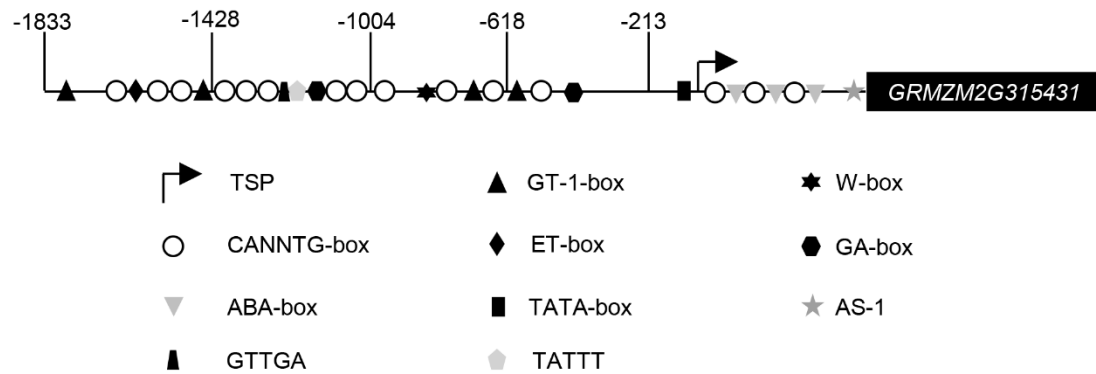

**Supplementary Figure S1. Schematic map of the *GRMZM2G315431* promoter with putative *cis*-elements and two novel identified *R. solani*-inducible *cis*-elements.** TSP, transcription start point; CANNTG-box, nematode-responsive box; ABA-box, ABA-responsive element; GT-1-box, pathogen- and NaCl-responsive element; ET-box, ET-responsive element; W-box, elicitor-responsive element; GA-box, GA-responsive element; AS-1, box of the *CaMV* 35S promoter; GTTGA and TATTT, two novel identified *R. solani*-inducible *cis*-elements.

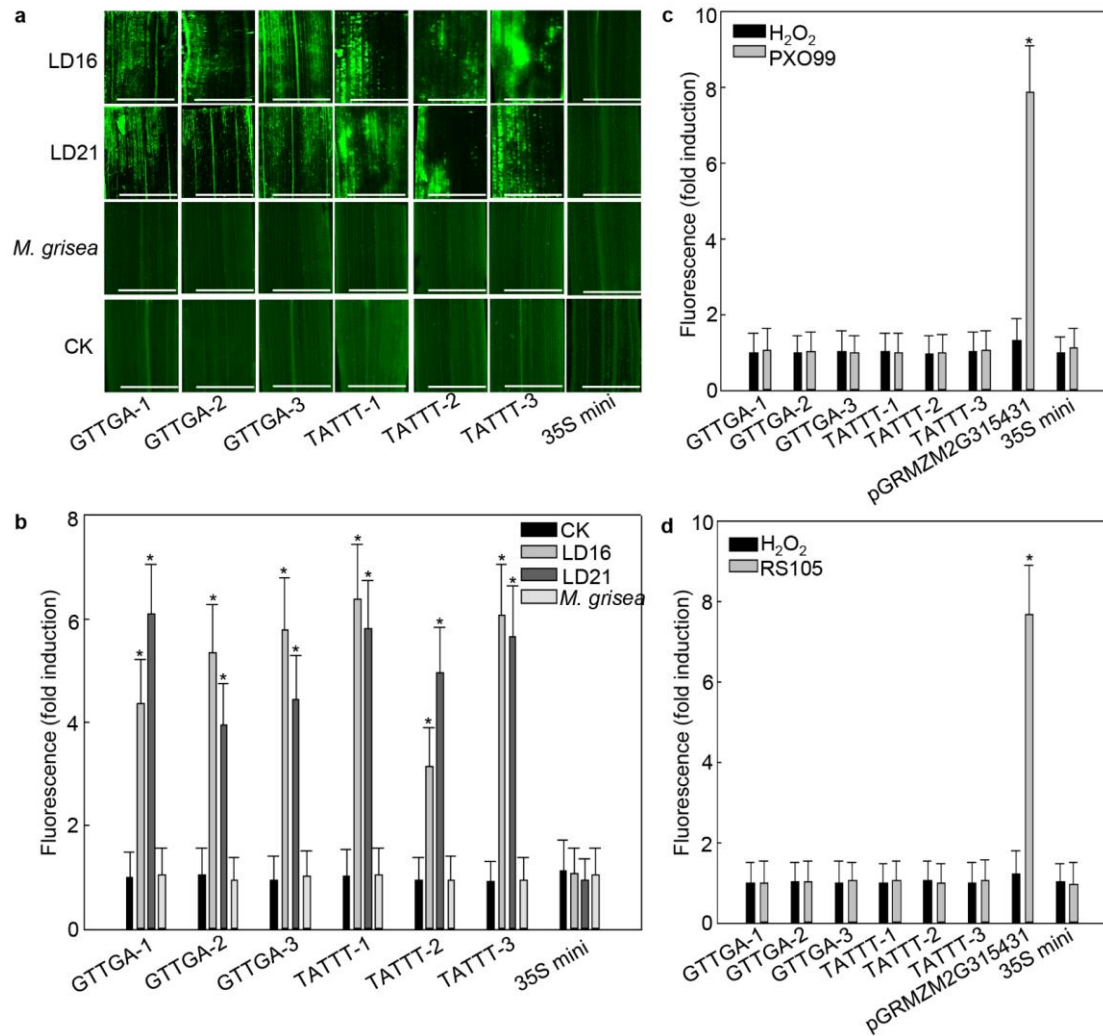

**Supplementary Figure S2. GFP expression driven by GTTGA and TATTT in the transgenic rice leaves post inoculation with *R. solani* strains LD16, LD21, *M. grisea*, *Xoo* and *Xoc*.** (a) GFP fluorescence assay of transgenic rice leaves inoculated with *R. solani* strains LD16, LD21 and *M. grisea*. Three T<sub>1</sub> lines of each element were used. Bars = 5 mm. (b) Quantitative fluorometric assay of transgenic rice leaves post inoculation with *R. solani* strains LD16, LD21 and *M. grisea*. The fluorescence value was calculated relative to CK of GTTGA-1. The 35S minimum promoter were used as the negative control. (c) Three T<sub>1</sub> lines of each element were inoculated with *Xoo* strain PXO99. The fluorescence value was calculated relative to H<sub>2</sub>O<sub>2</sub> of GTTGA-1. The full-length *GRMZM2G315431* promoter and 35S minimum promoter were used as the positive and negative controls, respectively. (d) Three T<sub>1</sub> lines

of each element were inoculated with *Xoc* strain RS105. The fluorescence value was calculated relative to H<sub>2</sub>O<sub>2</sub> of GTTGA-1. The full-length *GRMZM2G315431* promoter and 35S minimum promoter were used as the positive and negative controls, respectively. Error bars indicate the SD (n=3). Asterisks indicate P < 0.05 (\*) in Student's t test analysis.

**Table S1. List of primers used for expression analysis and cloning purposes.** Restriction site

sequences are underlined.

| Primer name   | Forward primer(5'-3')                                        | Reverse primer(5'-3')                             |
|---------------|--------------------------------------------------------------|---------------------------------------------------|
| GRMZM2G315431 | CGCGGTGCTCATCAACAG                                           | CGTCGGTCTGGTCGAACAG                               |
| pC1391 D0     | AAG <u>CTGCAG</u> TTCTATGGCAAAATCAATGAA<br>GG                | AAG <u>TCGACT</u> GGCGGTGACGATGGT<br>AA           |
| pCXGUS D1     | GAAAGATAGTGACCACTTTGACA                                      | TGGCGGTGACGATGGTA                                 |
| pCXGUS D2     | CTATTTAGCTATACTTCATGCTGTT                                    | TGGCGGTGACGATGGTA                                 |
| pCXGUS D3     | TGATTCACCTGCTGCTTATTTT                                       | TGGCGGTGACGATGGTA                                 |
| pCXGUS D4     | GGTGTGAATCCGTATTCGAGACT                                      | TGGCGGTGACGATGGTA                                 |
| pCXGUS D5     | AACAGTAGCATCTGAATCTGCAT                                      | TGGCGGTGACGATGGTA                                 |
| pCXGUS D6     | AGGGCTTCAAACAAAGGTATT                                        | TGGCGGTGACGATGGTA                                 |
| pCXGUS D7     | ATTTATTTGACACCCAAAAGATT                                      | TGGCGGTGACGATGGTA                                 |
| pCXGFP delA   | AACAGTAGCATCTGAATCTGCAT                                      | TTATATAGAGGAAGGGTCTTGCGAAT<br>CCAATCTTTGGTGCAAATA |
| pCXGFP delB   | AACAGTAGCATCTGAATCTGCATTTCAG<br>TGCGCAAGACCCTTCCTCTATATAA    | GGGACTGACCTACCCGGG                                |
| pCXGFP delC   | CTGGAGGAAGAGTTGTTAACAAGTACGC<br>AAGACCCTTCCTCTATATAA         | GGGACTGACCTACCCGGG                                |
| pCXGFP delD   | TCGTAGCCGTTTGGACCCTCAGGTGCGCA<br>AGACCCTTCCTCTATATAA         | GGGACTGACCTACCCGGG                                |
| pCXGFP delE   | GTTGAGGCACTTATTTGCACCAAAGATTG<br>GATTCGCAAGACCCTTCCTCTATATAA | GGGACTGACCTACCCGGG                                |
| pCXGFP delF   | GTTGAGGCACTTATTTGCAAGACCCTTC<br>CTCTATATAA                   | GGGACTGACCTACCCGGG                                |
| pCXGFP delG   | GCACCAAAGATTGGATTGCAAGACCCTT<br>CCTCTATATAA                  | GGGACTGACCTACCCGGG                                |
| I             | GTTGAGGCACTTATTTGCAAGACCCTTCC<br>TCTATATAA                   | GGGACTGACCTACCCGGG                                |
| II            | GGCACTTATTTGCAAGACCCTTCCTCTAT<br>ATAA                        | GGGACTGACCTACCCGGG                                |
| III           | TATTTGCAAGACCCTTCCTCTATATAA                                  | GGGACTGACCTACCCGGG                                |
| 2xGTTGA       | GTTGAGTTGACGCAAGACCCTTCCTCTATA<br>TAA                        | GGGACTGACCTACCCGGG                                |
| 2xTATTT       | TATTTTATTTGCAAGACCCTTCCTCTATAT<br>AA                         | GGGACTGACCTACCCGGG                                |
| 35S mini      | CGCAAGACCCTTCCTCTATATAA                                      | GGGACTGACCTACCCGGG                                |
